# Supplementary material
Source: HighWire-hosted journal article supplement (http://ajnr-stage2.highwire.org/highwire/filestream/182750/field_highwire_adjunct_files/0/18-01230.pdf)
Supplement: 18-01230.pdf [file 18-01230.pdf]

On-line Table 1: Clinical and imaging data according to motor outcome at 3-month follow-up

| Variables                                     | Overall (n = 43)   | Good Motor Outcome, mNIHSS (0–3) (n = 30) | Poor Motor Outcome, mNIHSS (4–8) (n = 13) | P Value            |
|-----------------------------------------------|--------------------|-------------------------------------------|-------------------------------------------|--------------------|
| Female (No.) (%)                              | 12 (27.9)          | 11 (36.7)                                 | 1 (7.7)                                   | .052               |
| Age (median) (IQR)                            | 68 (57–76)         | 64.5 (55–73)                              | 73 (67–76)                                | .252               |
| Hypertension (No.) (%)                        | 31 (72.1)          | 23 (76.7)                                 | 8 (61.5)                                  | .310               |
| Diabetes mellitus (No.) (%)                   | 8 (18.6)           | 6 (20.0)                                  | 2 (15.4)                                  | .721               |
| Leukocyte count (median) (IQR)                | 8.1 (5.88–10.86)   | 7.90 (5.55–10.64)                         | 8.69 (8.00–10.90)                         | .161               |
| Fibrinogen (median) (IQR)                     | 404 (315–459.5)    | 398 (301.75–444.75)                       | 425 (347–479)                             | .294               |
| Body temperature (median) (IQR)               | 36 (36–36.5)       | 36 (36–36.5)                              | 36.5 (35.8–36.55)                         | .799               |
| Platelet count (median) (IQR)                 | 197 (151.5–261)    | 205 (180.5–267.75)                        | 177 (141–243)                             | .281               |
| Antiplatelet treatment (No.) (%)              | 12 (27.9)          | 6 (23.3)                                  | 5 (38.5)                                  | .310               |
| NIHSS score at admission (median) (IQR)       | 13 (8–17)          | 11 (5–15)                                 | 17 (14–19)                                | .005 <sup>a</sup>  |
| mNIHSS score at admission (median) (IQR)      | 5 (2–8)            | 4 (2–6)                                   | 8 (7–8)                                   | .002 <sup>a</sup>  |
| NIHSS score at 72 hr (median) (IQR)           | 9 (2–16)           | 4.5 (1–10.75)                             | 17 (13–18)                                | <.001 <sup>a</sup> |
| mNIHSS score at 72 hr (median) (IQR)          | 3 (0–8)            | 1 (0–5)                                   | 8 (8–8)                                   | <.001 <sup>a</sup> |
| mRS at 3 mo (median) (IQR)                    | 3 (1–4)            | 2 (1–3)                                   | 4 (4–4)                                   | <.001 <sup>a</sup> |
| NIHSS score at 3 mo (median) (IQR)            | 3 (1–7.5)          | 2 (0.25–3.75)                             | 10 (8–12)                                 | <.001 <sup>a</sup> |
| Time from onset to MRI (median) (IQR) (min)   | 407 (238–559)      | 444 (313–623)                             | 238 (167–399)                             | .005 <sup>a</sup>  |
| ICH right hemisphere (No.) (%)                | 3 (6.98)           | 3 (30.0)                                  | 0 (0)                                     | .334               |
| ICH location (No.) (%)                        |                    |                                           |                                           | .641               |
| Superficial                                   | 5 (11.9)           | 3 (10.3)                                  | 2 (15.38)                                 |                    |
| Deep                                          | 37 (88.1)          | 26 (89.7)                                 | 11 (84.62)                                |                    |
| rFA at pons at admission                      | 1 (0.89–1.17)      | 0.99 (0.89–1.19)                          | 1.02 (0.91–1.14)                          | .966               |
| rRD at pons at admission                      | 0.98 (0.83–1.13)   | 0.98 (0.81–1.12)                          | 0.98 (0.83–1.16)                          | .862               |
| rMD at pons at admission                      | 0.97 (0.93–1.06)   | 0.98 (0.94–1.06)                          | 0.96 (0.83–1.06)                          | .610               |
| rAD at pons at admission                      | 1.03 (0.92–1.1)    | 1.03 (0.92–1.1)                           | 0.98 (0.92–1.11)                          | .686               |
| rFA at PLIC at admission                      | 1.06 (0.95–1.2)    | 1.1 (0.95–1.21)                           | 1 (0.94–1.09)                             | .200               |
| rRD at PLIC at admission                      | 0.94 (0.82–1.1)    | 0.88 (0.78–1.07)                          | 1.06 (0.87–1.35)                          | .085               |
| rMD at PLIC at admission                      | 1.01 (0.94–1.13)   | 0.99 (0.92–1.11)                          | 1.09 (1.03–1.16)                          | .072               |
| rAD at PLIC at admission                      | 1.1 (1–1.16)       | 1.08 (0.95–1.13)                          | 1.14 (1.07–1.24)                          | .060               |
| ICH volume at admission (median) (IQR) (mL)   | 12.66 (5.45–21.91) | 10.45 (5.07–15.74)                        | 22.74 (10.3–30)                           | .034 <sup>a</sup>  |
| PHE volume at admission (median) (IQR) (mL)   | 4.65 (1.83–11.19)  | 3.39 (1.48–11.12)                         | 5.89 (3.46–14.88)                         | .418               |
| ICH volume at 24 hr (median) (IQR) (mL)       | 15.78 (7.06–29.32) | 11.88 (6.5–17.85)                         | 26.45 (10.3–35.84)                        | .087               |
| PHE volume at 24 hr (median) (IQR) (mL)       | 11.69 (6.1–22.4)   | 10.6 (6.1–18.91)                          | 21.15 (9.47–48.35)                        | .133               |
| ICH growth (24 hr, baseline) (mL)             | 1 (0.08–2.82)      | 1.28 (0.19–1.98)                          | 0.67 (0–4.54)                             | .869               |
| CST involvement by ICH at admission (No.) (%) | 24 (55.8)          | 13 (43.33)                                | 11 (84.61)                                | .016 <sup>a</sup>  |
| Centrum semiovale                             | 4 (9.30)           | 0 (0)                                     | 4 (30.76)                                 | .002 <sup>a</sup>  |
| Corona radiata                                | 18 (41.86)         | 11 (36.66)                                | 7 (53.84)                                 | .335               |
| PLIC                                          | 14 (32.5)          | 5 (16.66)                                 | 9 (69.23)                                 | .001 <sup>a</sup>  |
| CST involvement by PHE at admission (No.) (%) | 33 (76.74)         | 25 (83.33)                                | 8 (61.5)                                  | .072               |
| Centrum semiovale                             | 6 (13.95)          | 4 (13.33)                                 | 2 (15.38)                                 | .892               |
| Corona radiata                                | 29 (67.44)         | 22 (73.33)                                | 7 (53.84)                                 | .154               |
| PLIC                                          | 17 (39.53)         | 14 (46.66)                                | 3 (23.07)                                 | .124               |

**Note:**—rMD indicates mean diffusivity ratio; rRD, radial diffusivity ratio; rAD, axial diffusivity ratio.

<sup>a</sup> Statistically significant.

**On-line Table 2: Clinical and imaging data according to functional outcome at 3-month follow-up**

| Variables                                     | Good Outcome, mRS 0–2 (n = 19) | Poor Outcome, mRS 3–5 (n = 24) | P Value            |
|-----------------------------------------------|--------------------------------|--------------------------------|--------------------|
| Female (No.) (%)                              | 8 (42.1)                       | 4 (16.7)                       | .065               |
| Age (median) (IQR)                            | 62 (50–70.5)                   | 72 (61.25–76)                  | .089               |
| Hypertension (No.) (%)                        | 14 (73.7)                      | 17 (70.8)                      | .836               |
| Diabetes mellitus (No.) (%)                   | 4 (21.1)                       | 4 (16.7)                       | .714               |
| Leukocyte count (median) (IQR)                | 8.1 (5.73–9.95)                | 8.35 (6.10–11.18)              | .509               |
| Fibrinogen (median) (IQR)                     | 384 (299.5–429.5)              | 430 (343.25–471.5)             | .14                |
| Body temperature (median) (IQR)               | 36.2 (36–36.7)                 | 36 (36–36.5)                   | .332               |
| Platelet count (median) (IQR)                 | 197 (183.5–261.5)              | 200 (146.8–255)                | .642               |
| Antiplatelet use (No.) (%)                    | 4 (21.1)                       | 8 (33.3)                       | .373               |
| NIHSS score at admission (median) (IQR)       | 10 (4–15.5)                    | 15 (10.5–18)                   | .016 <sup>a</sup>  |
| mNIHSS score at admission (median) (IQR)      | 3 (2–6.5)                      | 6.5 (4–8)                      | .019 <sup>a</sup>  |
| NIHSS score at 72 hr (median) (IQR)           | 2 (1–5)                        | 14 (9–17.25)                   | <.001 <sup>a</sup> |
| mNIHSS score at 72 hr (median) (IQR)          | 0 (0–1)                        | 7.5 (5–8)                      | <.001 <sup>a</sup> |
| mRS at 3 mo (median) (IQR)                    | 1 (1–2)                        | 4 (3–4)                        | <.001 <sup>a</sup> |
| NIHSS score at 3 mo (median) (IQR)            | 1 (0–2)                        | 7 (5–11)                       | <.001 <sup>a</sup> |
| Time from onset to MRI (median) (IQR) (min)   | 444 (312.5–584.5)              | 367 (228–525.5)                | .197               |
| ICH right hemisphere (No.) (%)                | 2 (40.0)                       | 1 (4.3)                        | .310               |
| ICH location (No.) (%)                        |                                |                                | .227               |
| Superficial                                   | 1 (5.3)                        | 4 (17.4)                       |                    |
| Deep                                          | 18 (94.7)                      | 19 (82.6)                      |                    |
| rFA at pons at admission                      | 0.98 (0.9–1.16)                | 1.04 (0.89–1.17)               | .957               |
| rRD at pons at admission                      | 0.99 (0.82–1.1)                | 0.97 (0.83–1.14)               | .753               |
| rMD at pons at admission                      | 0.97 (0.94–1.07)               | 0.99 (0.88–1.06)               | .586               |
| rAD at pons at admission                      | 1.07 (0.91–1.15)               | 1 (0.92–1.09)                  | .460               |
| rFA at PLIC at admission                      | 1.13 (0.98–1.3)                | 1 (0.93–1.14)                  | .143               |
| rRD at PLIC at admission                      | 0.82 (0.75–1.05)               | 0.94 (0.85–1.14)               | .070               |
| rMD at PLIC at admission                      | 0.97 (0.93–1.09)               | 1.05 (0.98–1.15)               | .054               |
| rAD at PLIC at admission                      | 1.06 (0.99–1.11)               | 1.13 (1.04–1.21)               | .156               |
| ICH volume at admission (median) (IQR) (mL)   | 6.69 (4.53–13.11)              | 18 (10.03–29.82)               | .004 <sup>a</sup>  |
| PHE volume at admission (median) (IQR) (mL)   | 3.07 (2.2–6.79)                | 6.3 (1.7–21.66)                | .27                |
| ICH volume at 24 hr (median) (IQR) (mL)       | 11.53 (6.24–15.9)              | 20.2 (10.59–35.65)             | .036 <sup>a</sup>  |
| PHE volume at 24 hr (median) (IQR) (mL)       | 10.6 (4.55–13.12)              | 21.05 (7.07–35.09)             | .121               |
| ICH growth (24 hr, baseline) (mL)             | 0.7 (0.18–2.09)                | 1.3 (0.02–3.02)                | .91                |
| CST involvement by ICH at admission (No.) (%) | 8 (42.1)                       | 16 (69.6)                      | .073               |
| Centrum semiovale                             | 0 (0)                          | 4 (17.4)                       | .056               |
| Corona radiata                                | 8 (42.1)                       | 10 (43.5)                      | .929               |
| PLIC                                          | 2 (10.5)                       | 12 (52.1)                      | .004 <sup>a</sup>  |
| CST involvement by PHE at admission (No.) (%) | 17 (89.5)                      | 16 (69.6)                      | .118               |
| Centrum semiovale                             | 3 (15.8)                       | 3 (13.0)                       | .800               |
| Corona radiata                                | 15 (78.9)                      | 14 (60.9)                      | .207               |
| PLIC                                          | 9 (47.4)                       | 8 (34.8)                       | .408               |

**Note:**—rMD indicates mean diffusivity ratio; rRD, radial diffusivity ratio; rAD, axial diffusivity ratio.

<sup>a</sup> Statistically significant.
